# Supplementary material
Source: PubMed Central journal article supplement (PMC4260712)

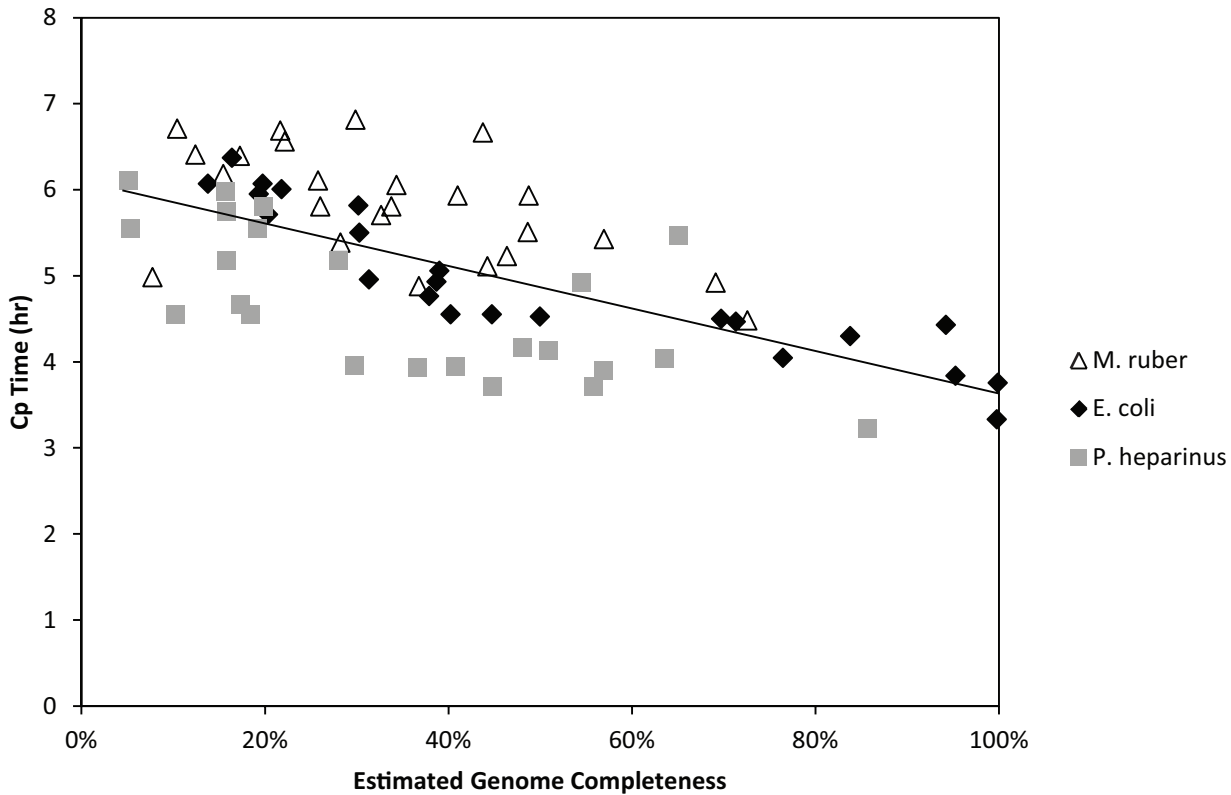

Supplement: ismej201492x2.pdf [file ismej201492x2.pdf]

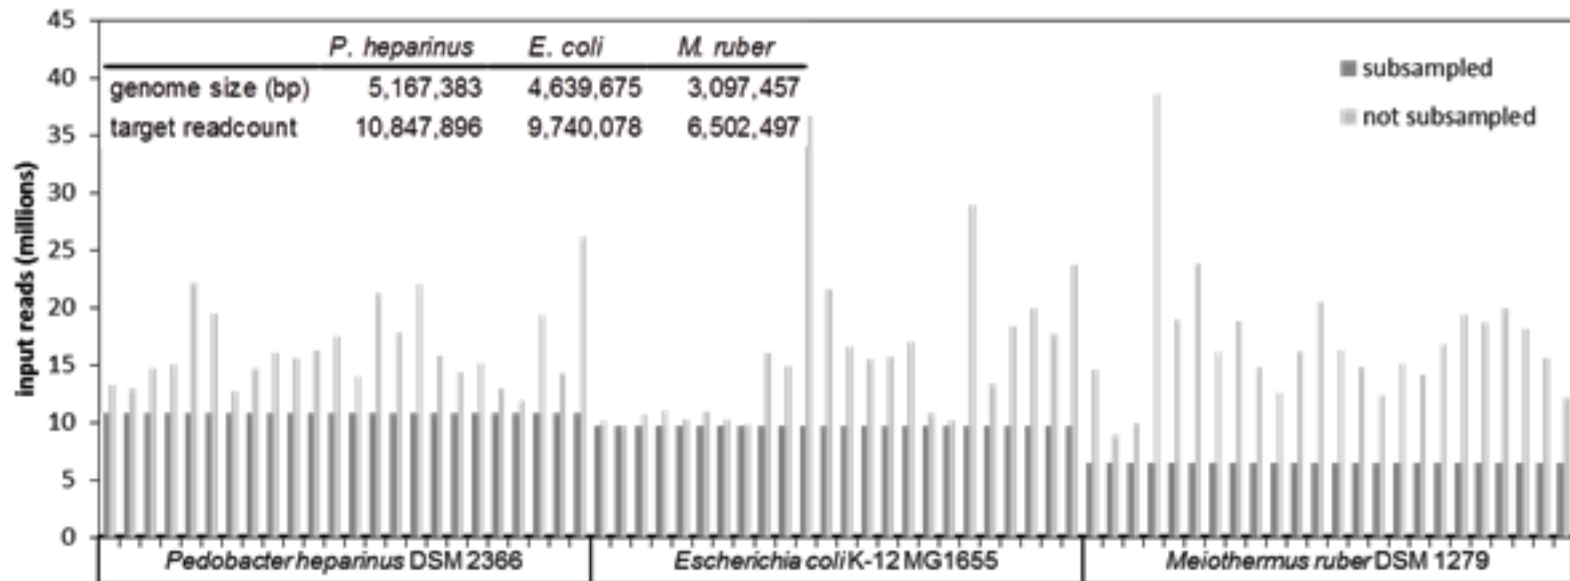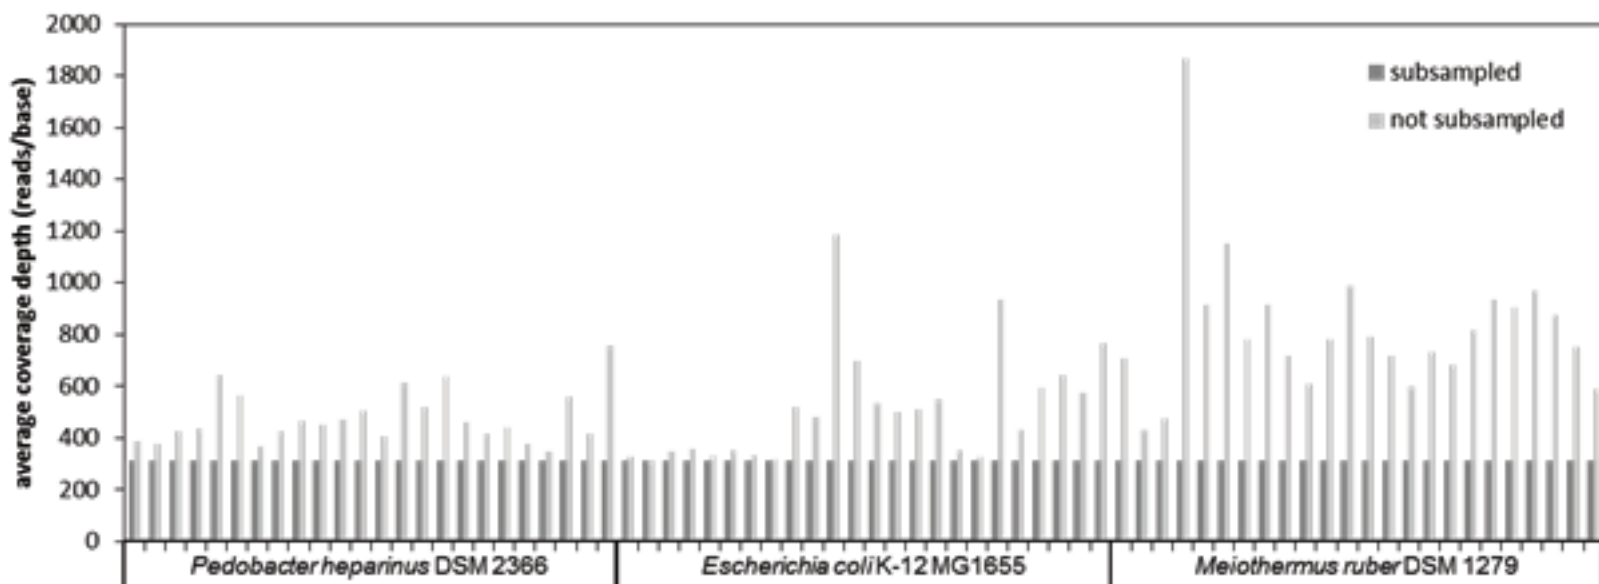

Supplement: ismej201492x3.pdf [file ismej201492x3.pdf]

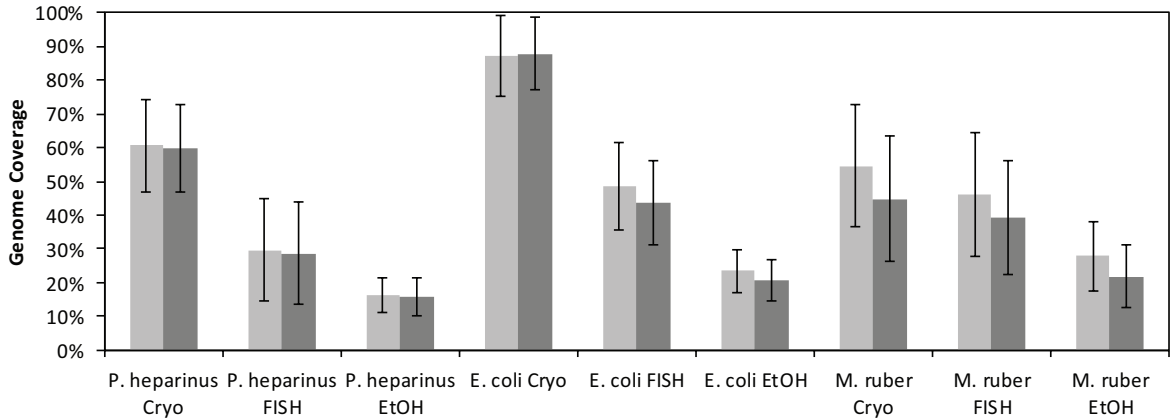

Supplement: ismej201492x4.pdf [file ismej201492x4.pdf]
